1 **c-di-AMP hydrolysis by a novel type of phosphodiesterase**  
2 **promotes differentiation of multicellular bacteria**

3  
4  
5 **Andreas Latoscha<sup>1§</sup>, David Jan Drexler<sup>2§</sup>, Mahmoud M. Al-Bassam<sup>3</sup>,**  
6 **Volkhard Kaever<sup>4</sup>, Kim C. Findlay<sup>5</sup>, Gregor Witte<sup>2\*</sup> and Natalia Tschowri<sup>1\*</sup>**

7  
8 *<sup>1</sup>Department of Biology / Microbiology, Humboldt-Universität zu Berlin, 10115 Berlin,*  
9 *Germany*

10 *<sup>2</sup>Gene Center and Department of Biochemistry, Ludwig-Maximilians-Universität München,*  
11 *81377 Munich, Germany*

12 *<sup>3</sup>Department of Pediatrics, University of California, San Diego, La Jolla, California 92093,*  
13 *USA*

14 *<sup>4</sup>Research Core Unit Metabolomics, Medizinische Hochschule Hannover, 30625 Hannover,*  
15 *Germany*

16 *<sup>5</sup>Department of Cell and Developmental Biology, John Innes Centre, Norwich Research Park,*  
17 *Norwich NR4 7UH, UK*

18  
19 § These authors contributed equally to this work

20 \* Corresponding author: [natalia.tschowri@hu-berlin.de](mailto:natalia.tschowri@hu-berlin.de)

21 \* Correspondence may also be addressed to: [witte@genzentrum.lmu.de](mailto:witte@genzentrum.lmu.de)

22  
23 **Keywords:** c-di-AMP, *Streptomyces*, phosphodiesterase, development, osmostress

24

25 **ABSTRACT**

26 Antibiotic-producing *Streptomyces* use the diadenylate cyclase DisA to synthesize the  
27 nucleotide second messenger c-di-AMP but the mechanism for terminating c-di-AMP signaling  
28 and the proteins that bind the molecule to effect signal transduction are unknown. Here, we  
29 identify the AtaC protein as a new type of c-di-AMP-specific phosphodiesterase that is also  
30 conserved in pathogens such as *Streptococcus pneumoniae* and *Mycobacterium tuberculosis*.  
31 AtaC is monomeric in solution and binds Mn<sup>2+</sup> to specifically hydrolyze c-di-AMP to AMP via  
32 the intermediate 5'-pApA. As an effector of c-di-AMP signaling, we characterize the RCK-  
33 domain protein CpeA as the first c-di-AMP-binding protein to be identified in *Streptomyces*.  
34 CpeA interacts with the predicted cation / proton antiporter, CpeB, linking c-di-AMP signaling  
35 to ion homeostasis in actinobacteria. Hydrolysis of c-di-AMP is critical for normal growth and  
36 differentiation in *Streptomyces*, connecting osmotic stress to development. Thus, we present  
37 the discovery of two novel components of c-di-AMP signaling in bacteria and show that precise  
38 control of this second messenger is essential for osmoregulation and coordinated development  
39 in *Streptomyces*.

40

41

42

43

44

## 45 INTRODUCTION

46 Bacteria use mono-, di-, and trinucleotides as second messengers to control fundamental  
47 physiological functions in response to signal sensing (1). Among these molecules, cyclic di-  
48 3',5'-adenosine monophosphate (c-di-AMP) is the only nucleotide messenger that must be  
49 precisely balanced, since both, its depletion and overproduction can be toxic (2). Its core  
50 function is to control cellular integrity by setting homeostasis of osmolytes that in many bacteria  
51 are used for osmoregulation (3, 4). Changes of external osmolarity trigger water fluxes across  
52 the membrane, which can lead to cell dehydration or swelling and finally collapse or burst when  
53 osmobalance mechanisms fail to respond properly (5). As a key component of these  
54 mechanisms, c-di-AMP directly targets transport systems for osmoactive and osmoprotective  
55 substances such as potassium ions and low-molecular-weight compatible solutes in many  
56 bacteria (6-10).

57 c-di-AMP also plays a central role in host-pathogen interactions and bacterial virulence  
58 (11). Secreted c-di-AMP is recognized by host' innate immunity receptors STING, DDX41 and  
59 RECON to regulate type I interferon immune response and NF-kB pathways, respectively (12-  
60 15). Modulation of intracellular c-di-AMP has been reported to affect virulence of  
61 *Streptococcus pyogenes* (16), *Listeria monocytogenes* (17), *Streptococcus pneumonia* (18) and  
62 *Mycobacterium tuberculosis* so that the molecule is considered as an attractive antimicrobial  
63 target (19).

64 c-di-AMP synthesis out of two ATP molecules is catalyzed by the diadenylate cyclase  
65 (DAC) activity of the DisA\_N domain (Pfam PF02457), which was identified in the structural  
66 and biochemical analysis of the DNA-integrity scanning protein A (DisA) of *Thermotoga*  
67 *maritima* (20). DisA is mainly present in sporulating firmicutes and actinobacteria (21) and has  
68 a conserved domain organization consisting of a N-terminal DAC domain and a C-terminal  
69 DNA-binding helix-hairpin-helix domain separated by a linker region (20). C-di-AMP  
70 hydrolysis is mediated by the DHH-DHHA1 domain containing the Asp-His-His motif. The  
71 multidomain membrane-associated GdpP protein in *Bacillus subtilis* was the first characterized  
72 DHH-DHHA1-type phosphodiesterase (PDE) (22). In addition, HD domains with a catalytic  
73 His-Asp motif, which were first identified in the PgpH protein in *L. monocytogenes*, also  
74 degrade c-di-AMP (17).

75           However, most actinobacteria contain DisA for c-di-AMP synthesis but do not encode  
76 DHH-DHHA1-domain containing or HD-type c-di-AMP PDEs. Hence, we wondered how  
77 actinomycetes balance intracellular c-di-AMP. Within actinobacteria, *Streptomyces* are the  
78 most extensively studied mycelial organisms and the richest natural source of antibiotics (23).  
79 For growth and reproduction, *Streptomyces* undergo a complex developmental life cycle, which  
80 involves the conversion between three morphologically and physiologically distinct forms of  
81 cell existence. During exponential growth, they proliferate by extension and branching of  
82 vegetative hyphae. The switch to stationary phase and onset of the reproductive phase is marked  
83 by the erection of aerial hyphae. These filaments elongate and divide into unigenomic prespore  
84 compartments that ultimately mature into chains of spores. Completion of the developmental  
85 program is easily visible by eye since mature *Streptomyces* spores accumulate a spore pigment.  
86 For example, our model species, the chloramphenicol producer *S. venezuelae*, is characterized  
87 by a green spore pigment such that colonies turn green at the end of the life cycle (24, 25).  
88 Importantly, antibiotic production and morphological differentiation are co-regulated in  
89 *Streptomyces*. Hence, studying their developmental biology also provides a better  
90 understanding of the control of their secondary metabolism.

91           In this work, we identified and characterized the PDE superfamily protein AtaC as the  
92 founding member of a novel type of c-di-AMP-specific hydrolases. AtaC is broadly distributed  
93 in bacteria and the only known c-di-AMP PDE in most actinomycetes. Among others,  
94 pathogens such as the causative agent of pneumonia, *S. pneumoniae*, contain an AtaC homolog  
95 that we characterize here to be a functional c-di-AMP hydrolase. Our biochemical and structural  
96 analyses show that AtaC is a monomeric Mn<sup>2+</sup>-dependent PDE with high affinity for c-di-AMP.  
97 Moreover, we provide direct biochemical evidence that *Streptomyces* DisA is an active DAC  
98 and that c-di-AMP produced by DisA is crucial for survival under ionic stress conditions.  
99 Further, we show that accumulation of c-di-AMP in the *S. venezuelae* *ataC* mutant results in  
100 profound developmental and growth defects and report the identification of the RCK\_C-domain  
101 (RCK for regulator of conductance of K<sup>+</sup>) containing protein CpeA as the first c-di-AMP  
102 binding protein in *Streptomyces*. Overall, in this study we identified and functionally  
103 characterized core components of c-di-AMP signaling in *Streptomyces* and link c-di-AMP  
104 regulation with ion homeostasis to control differentiation in multicellular bacteria.

105 **RESULTS**

106

107 **DisA is the major c-di-AMP synthetase in *S. venezuelae***

108

109 DisA is the sole DAC protein encoded in the *S. venezuelae* genome and is conserved in all  
110 sequenced *Streptomyces* strains. To demonstrate DisA DAC activity, we purified N-terminally  
111 his-tagged DisA and DisA<sub>D86A</sub> that carries an alanine instead of aspartate in the active site. We  
112 included his-tagged *B. subtilis* DisA (DisA<sub>Bsu</sub>) as a positive control for enzymatic activity (20).  
113 [<sup>32</sup>P]-labeled ATP was added as substrate for *in vitro* DAC assays and the reactions were  
114 separated by thin layer chromatography (TLC). DisA synthesized c-di-AMP whereas the  
115 mutated DisA<sub>D86A</sub> failed, demonstrating that *S. venezuelae* DisA is a functional DAC, which  
116 requires the conserved catalytic aspartate D<sub>86</sub> for activity (Figure 1A).

117 *In vivo*, DisA is the major source for c-di-AMP in *S. venezuelae* (Figure 1B) (26),  
118 however, we reproducibly detected low c-di-AMP levels in  $\Delta disA$  during vegetative growth (10  
119 and 12 h), which disappeared upon onset of sporulation (14 h), suggesting that *S. venezuelae*  
120 might contain a non-DAC-domain enzyme capable of c-di-AMP production (Figure 1B). The  
121 presence of c-di-AMP throughout the wild type *S. venezuelae* life cycle suggested that *disA*  
122 expression is constitutive. To confirm this, we complemented the *disA* mutant by chromosomal  
123 insertion of a C-terminally 3xFLAG-tagged *disA* under control of its native promoter. Using a  
124 monoclonal anti-FLAG antibody, we detected constant DisA-3xFLAG expression in all  
125 developmental stages, which correlated with c-di-AMP production in the wild type under the  
126 conditions tested (Figure 1C).

127 Altogether, our data show that DisA is a functional DAC *in vitro* and *in vivo* and the  
128 major enzyme for c-di-AMP production in *S. venezuelae*.

129

130 **The phosphodiesterase superfamily protein AtaC (Vnz\_27310) degrades c-di-AMP**

131

132 *Streptomyces* do not possess PDEs with a DHH-DHHA1 domain or a PgpH-type HD domain,  
133 known to degrade c-di-AMP in other bacteria (17, 22), raising the question as to how *S.*  
134 *venezuelae* removes c-di-AMP from the cytoplasm. To find a potentially novel c-di-AMP PDE,

135 we used interproscan (<http://dx.doi.org/10.7717/peerj.167>) to search for Pfam PF01663, which  
136 is associated with putative type I phosphodiesterases/nucleotide pyrophosphatases. Among  
137 others, we found two proteins (Vnz\_27310 and Vnz\_31010) belonging to the phosphodiesterase  
138 and metallophosphatase superfamilies, respectively, that we selected for *in vitro* PDE activity  
139 tests.

140 Purified N-terminally his-tagged Vnz\_27310 and Vnz\_31010 were assayed *in vitro*  
141 using [<sup>32</sup>P]-labeled c-di-AMP as substrate. While we could not detect [<sup>32</sup>P]-c-di-AMP cleavage  
142 activity for Vnz\_31010, Vnz\_27310 clearly degraded c-di-AMP to 5'-pApA and finally to AMP  
143 (Figure 2A) so that we named Vnz\_27310 AtaC for actinobacterial PDE targeting c-di-AMP.  
144 Addition of unlabeled c-di-AMP but not of c-di-GMP or cAMP competed with [<sup>32</sup>P]-c-di-AMP  
145 and led to reduced cleavage of the radiolabeled substrate, showing specificity for c-di-AMP  
146 (Figure 2A). We analyzed the kinetics of c-di-AMP hydrolysis activity of Vnz\_27310 using  
147 anion exchange chromatography assays and determined a  $k_{cat}$  of 0.2 s<sup>-1</sup> (Figure S1 A-B), while  
148 only a negligible c-di-GMP hydrolysis activity was detected (Figure S1 C). We also compared  
149 Vnz\_27310-dependent hydrolysis of the linear dinucleotides 5'-pApG and 5'-pGpG to the  
150 hydrolysis of 5'-pApA and observed a high hydrolysis activity for 5'-pApA ( $k_{cat}$ = 2.1 s<sup>-1</sup>),  
151 whereas the other substrates tested were only degraded to a small extent (Figures 2B and S1 D-  
152 F).

153 Using the PATRIC database (<https://www.patricbrc.org>), we examined the distribution  
154 of the here discovered c-di-AMP PDE (PGF\_00172869) and found at least 5374 prokaryotic  
155 species containing homologs to AtaC (Table S2), including pathogens such as *S. pneumoniae*  
156 and *M. tuberculosis*. AtaC from *S. pneumoniae* (AtaC<sub>SPN</sub>; sequence ID: CVN04004.1) and from  
157 *M. tuberculosis* (AtaC<sub>MTU</sub>; sequence ID: CNE38097.1) share 41 % and 47 %, respectively,  
158 identical residues with AtaC from *S. venezuelae*. In agreement with the high degree of protein  
159 identity, enzyme assays data shown in Figure 2C demonstrate that AtaC<sub>SPN</sub> also represents a c-  
160 di-AMP PDE and AtaC<sub>MTU</sub> likely has the same function.

161 In summary, we identified and functionally characterized the sole c-di-AMP hydrolase  
162 in *Streptomyces* and a new c-di-AMP signaling component in pathogens and show that AtaC is  
163 a conserved phosphodiesterase that efficiently and specifically hydrolyzes c-di-AMP to AMP  
164 via the intermediate 5'-pApA.

165

## 166 **AtaC is a monomeric Mn<sup>2+</sup>-dependent phosphodiesterase**

167

168 To further characterize the c-di-AMP hydrolysis mechanism of AtaC and to gain some  
169 structural insights into this PDE, we used HHpred (27) and found two close structural  
170 homologs. The core domain of a phosphonoacetate hydrolase (PhnA) from *Sinorhizobium*  
171 *meliloti* 1021 (28) and PDB code 3SZY) showed highest similarity and served as a template for  
172 the structural model of AtaC including the putative active site. The predicted active site  
173 comprises three aspartates (D68, D227 and D269), three histidines (H231, H270 and H384) and  
174 one threonine (T108) (Figure 3A).

175 Our size-exclusion chromatography (SEC) coupled multi-angle laser light scattering  
176 (MALLS) data show that AtaC is a monomer in solution with a molecular weight of 43.7 kDa  
177 (Figure S2A). The calculated *ab initio* shape of AtaC from SEC-SAXS (size-exclusion coupled  
178 small-angle X-ray scattering) data superimposes well with the HHpred model structure (Figure  
179 3B) and the measured SAXS curve of AtaC is very similar to the theoretical scattering curve of  
180 PhnA (Figure S2 B-D), indicating that AtaC and PhnA have a similar shape in solution.

181 The enzymatic reaction of the PhnA-class hydrolases is known to be catalyzed by two  
182 metal ions in the active site (28) so we tested metal binding for AtaC by thermal unfolding  
183 assays using nano differential scanning fluorimetry (nanoDSF) assay and observed protein  
184 stabilization upon addition of manganese ions (Mn<sup>2+</sup>) (Figure 3C). Based on the structural  
185 similarity to PhnA, we identified potential metal-binding residues in AtaC and generated a  
186 variant, AtaC<sub>D269N</sub>, that we expected to lack Mn<sup>2+</sup> coordination but retain nucleotide binding,  
187 as shown for DHH-DHHA1-type PDEs (22, 29). NanoDSF data confirmed stability of  
188 AtaC<sub>D269N</sub> with a melting temperature comparable to the wild type protein when incubated with  
189 ethylenediaminetetraacetic acid (EDTA) (Figure 3D). Moreover, AtaC<sub>D269N</sub> behaved  
190 identically to the wild type protein during purification and final SEC. In line with our  
191 predictions, AtaC<sub>D269N</sub> failed to bind Mn<sup>2+</sup> (Figure 3E) and did not hydrolyze c-di-AMP, as  
192 shown using ion exchange chromatography (IEX) based assays (Figure S3A). However,  
193 AtaC<sub>D269N</sub> was still capable of c-di-AMP binding, as confirmed by nanoDSF experiments that  
194 showed a shift in the melting curve with increasing ligand concentration (Figure 3F). Using

195 isothermal titration calorimetry (ITC) analysis we determined the dissociation constant ( $K_d$ ) of  
196  $\text{AtaC}_{\text{D269N}}$  for c-di-AMP to be  $731 \pm 266$  nM, whereas binding of c-di-GMP could not be  
197 detected (Figures 3G-H, and Figure S3B).

198 Altogether, our combined structural analysis and biochemical data strongly suggest that  
199  $\text{AtaC}$  uses the same metal-ion dependent mechanism as its structural homolog  $\text{PhnA}$  for  
200 substrate cleavage.

201

### 202 **$\text{AtaC}$ hydrolyzes c-di-AMP *in vivo***

203

204 We quantified c-di-AMP in cell extracts isolated from wild type *S. venezuelae* and the  
205  $\text{ataC}$  null mutant using LC-MS/MS. Our data show that c-di-AMP levels are elevated in the  
206  $\text{ataC}$  mutant during all developmental stages when compared to the wild type, demonstrating  
207 that  $\text{AtaC}$  degrades c-di-AMP *in vivo* and thus is an important component of c-di-AMP  
208 metabolism in *S. venezuelae* (Figure 4A). Western blot analysis showed that  $\text{AtaC}$  is  
209 constitutively expressed across the developmental cycle (Figure 4B).

210

### 211 **Inactivation of $\text{AtaC}$ delays *S. venezuelae* development**

212

213 To investigate the physiological functions of  $\text{disA}$  and  $\text{ataC}$  and thus of c-di-AMP in *S.*  
214 *venezuelae*, we first analyzed the developmental phenotypes of mutant strains. Colonies of *S.*  
215 *venezuelae*  $\Delta\text{disA}$  became green (Figure 5A) and scanning electron microscopy (SEM)  
216 confirmed that the  $\Delta\text{disA}$  mutant produced spore chains with identical morphology to those of  
217 the wild type (Figure 5B). Thus, neither the  $\text{DisA}$  protein nor the c-di-AMP produced by  $\text{DisA}$   
218 is required for differentiation.

219 In contrast, the  $\text{ataC}$  mutant showed a severe delay in development. After 4 days, the  
220  $\Delta\text{ataC}$  strain developed aerial hyphae but did not turn green as the wild type (Figure 5A) and  
221 SEM imaging showed mainly undifferentiated aerial hyphae, in contrast to the fully sporulated  
222 hyphae seen in the wild type (Figure 5B). Moreover, many of the aerial hyphae of the  $\Delta\text{ataC}$   
223 mutant had lysed. After extended incubation (7 days), the aerial hyphae of the  $\Delta\text{ataC}$  mutant



224 had largely sporulated, with sporadic non-differentiated and lysed filaments still detected  
225 (Figure 5B).

226 The lysed hyphae seen in the SEMs led us to analyze the growth the  $\Delta$ *ataC* strain in  
227 liquid MYM. As shown in Figure 5C, the *ataC* mutant grew slower than the wild type in  
228 exponential phase but reached a similar final OD<sub>578</sub> after 20 hours. Notably, deletion of *disA*  
229 had no effect on growth (Figure 5C).

230 We could fully complement the defects of  $\Delta$ *ataC* in development and growth by  
231 introduction of the *ataC* wild type allele under the control of its native promoter from the  
232 pIJ10170 vector (30) that integrates into the chromosomal *attB* <sub>$\Phi$ BT1</sub> site (Figure 5A and S4A).  
233 In contrast, expression of the *ataC*<sub>D269N</sub>, which cannot cleave c-di-AMP (Figure S3A) from the  
234 same integrative vector did not restore the developmental defects caused by *ataC* deletion  
235 (Figure 5A), showing that the cleavage of c-di-AMP by AtaC is crucial for normal development  
236 of *Streptomyces*.

237 Altogether, these results demonstrate that elevated levels of c-di-AMP impair growth  
238 and development, whereas reduced levels of c-di-AMP do not affect differentiation under  
239 standard growth conditions.

240

#### 241 ***disA* mutant is more susceptible to ionic osmstress**

242

243 Since regulation of osmotic balance is a major function of c-di-AMP in many bacteria  
244 (3), we next investigated the osmotic stress resistance of strains with altered c-di-AMP levels  
245 due to mutations in either *ataC* or *disA*. We spotted serially diluted spores on nutrient agar (NA)  
246 medium plates supplemented with 0.5 M NaCl and a control plate without extra added NaCl.  
247 On both plates, the growth of the  $\Delta$ *ataC* strain was slightly impaired resulting in smaller colony  
248 size compared to the wild type (Figure 5D), which likely reflects the growth defect of this strain  
249 (Figure 5C). We complemented the growth phenotype of  $\Delta$ *ataC* with the *ataC* wild type allele  
250 expressed *in trans* from the integrative vector pIJ10170 from the *attB* <sub>$\Phi$ BT1</sub> site under the control  
251 of the native promoter (Figure 5D).

252 In contrast, when grown on NA plates containing 0.5 M NaCl,  $\Delta$ *disA* and *disA*<sub>D86A</sub>  
253 showed pronounced reduction in growth. Expression of wild type *disA* from pIJ10170 fully

254 complemented the growth defect of  $\Delta disA$  (Figure 5D). The identical  $\Delta disA$  and  $disA_{D86A}$   
255 phenotypes demonstrate that c-di-AMP produced by DisA is crucial for osmotic stress  
256 resistance in *S. venezuelae* (Figure 5D).

257 In summary, our data revealed that accumulation of c-di-AMP due to *ataC* inactivation,  
258 delays development and slows down *Streptomyces* growth in the exponential phase. On the  
259 other hand, depletion of c-di-AMP due to *disA* inactivation renders *S. venezuelae* highly  
260 susceptible to ionic osmostress.

261

### 262 **The RCK\_C domain protein CpeA (Vnz\_28055) binds c-di-AMP**

263

264 RCK\_C domains are established direct targets of c-di-AMP that have the  
265 I(L)I(L)X<sub>2</sub>DX<sub>1</sub>RX<sub>5</sub>NI(L)I(L) signature for ligand binding (Figure 6A) (31). We found the  
266 RCK\_C-domain protein Vnz\_28055 with a putative c-di-AMP binding motif (Figure 6A-B) in  
267 93 *Streptomyces* species for which complete genome sequences are available (32). We purified  
268 N-terminally His-tagged Vnz\_28055 and applied differential radial capillary action of ligand  
269 assay (DRaCALA) to probe interaction between Vnz\_28055 and c-di-AMP. DRaCALA allows  
270 visualization of protein-bound radiolabeled ligand as a concentrated ring after the application  
271 of the protein-ligand mixture onto nitrocellulose (33). With this assay, we confirmed that  
272 Vnz\_28055 binds [<sup>32</sup>P]-labeled c-di-AMP (Figure 6C). Excess unlabeled c-di-AMP but not c-  
273 di-GMP competed with [<sup>32</sup>P]-c-di-AMP for binding to Vnz\_28055. Thus, we identified  
274 Vnz\_28055 as the first c-di-AMP binding protein in the genus *Streptomyces*.

275 *Vnz\_28055* forms a conserved operon with *vnz\_28050*. Some *Streptomyces* species,  
276 such as *S. venezuelae*, contain the small open reading frame *vnz\_28045* in the same operon  
277 (Figure 6B). Vnz\_28050 is a structural homolog of the sodium/proton antiporter NapA (PDB  
278 code 5BZ3\_A) from *Thermus thermophilus* (34), as predicted with 100 % probability using  
279 HHpred (27). To test whether Vnz\_28055 and Vnz\_28050 form a functional interacting unit,  
280 we used a bacterial two-hybrid system in which an interaction between bait and target protein  
281 reconstitutes a functional adenylate cyclase (Cya), that allows a *E. coli*  $\Delta cya$  mutant to utilize  
282 maltose as a carbon source (35). The two proteins were found to form a complex (Figure 6D),  
283 supporting our model that c-di-AMP controls the transport activity of Vnz\_28050 by binding

284 to its interaction partner Vnz\_28055. Thus, we connect the c-di-AMP function to ionic balance  
285 in *Streptomyces* and renamed Vnz\_28055-28045 to CpeABC for cation proton exchange  
286 component A, B and C.

287

## 288 **DISCUSSION**

289

290 In this work, using the chloramphenicol-producer *S. venezuelae* as a model and a combination  
291 of bioinformatic, biochemical, structural and genetic analyses, we identified AtaC as a novel  
292 class of c-di-AMP specific PDEs. AtaC is widely distributed in bacteria and represent the only  
293 c-di-AMP PDE in the majority of actinobacteria and an up to now unrecognized c-di-AMP  
294 signaling component in pathogens, such as *S. pneumoniae* (Figure 2 and Table S2).

295 AtaC is a soluble, single-domain phosphodiesterase superfamily protein that is  
296 monomeric in solution (Figure S2). In solution, AtaC is structurally similar to the alkaline  
297 phosphatase superfamily domain of the C-P bond-cleaving enzyme PhnA from *S. meliloti* 1021  
298 (Figure 3A) (28). As described for DHH-DHHA1 domain-containing proteins GdpP and DhhP,  
299 and the HD-domain PDE PgpH, AtaC binds  $Mn^{2+}$  to hydrolyze c-di-AMP and we show that  
300 residue D269 participates in metal-ion coordination contributing to the active site formation  
301 (Figure 3C-E) (17, 22, 36). AtaC has a  $k_{cat}$  of 0.2  $s^{-1}$  which is comparable to the reported  $k_{cat}$  of  
302 GdpP (0.55  $s^{-1}$ ). Hydrolytically inactive AtaC<sub>D269N</sub> has a dissociation constant of 0.7  $\mu M$ , which  
303 is highly similar to the  $K_d$  of wild type PgpH (0.3 - 0.4  $\mu M$ ) (Figures 3G-H) (17, 22). Since we  
304 determined the AtaC dissociation constant using a protein carrying the D269N mutation lacking  
305  $Mn^{2+}$ -coordination, the  $K_d$  value represents a lower limit as the metal ions bound by the wild  
306 type protein likely contribute to c-di-AMP binding. However, while PgpH- and GgdP-type  
307 PDEs hydrolyze c-di-AMP exclusively to the linear 5'-pApA, AtaC cleaves c-di-AMP and the  
308 intermediate product 5'-pApA to AMP, which has also been shown for DhhP-type PDEs  
309 (Figures 2A-B and S1A-B, D) (17, 22, 36). The substrate specificity of AtaC is strictly  
310 dependent on two adenosine bases as it shows only weak hydrolysis activity for 5'-pApG and  
311 5'-pGpG in contrast to the DhhP-type PDE TmPDE, which does not distinguish between  
312 different nucleobases (Figures 2B and S1E-F) (29).

313

314 In *Streptomyces*, AtaC and the DAC DisA are the major regulators of c-di-AMP  
315 (Figures 1B and 4A). However, strikingly, the phenotypes of the  $\Delta ataC$  and  $\Delta disA$  mutants with  
316 high and low c-di-AMP, respectively, are not inverses. On standard growth medium, elevation of  
317 intracellular c-di-AMP in  $\Delta ataC$  interferes with growth and ordered hyphae-to-spores  
318 transition, while reduction of the second messenger in  $\Delta disA$  does not have any noticeable  
319 consequences on these cell functions. On the other hand, when incubated at high external NaCl  
320 concentrations,  $\Delta disA$  is severely inhibited in growth, whereas  $\Delta ataC$  grows similarly to the  
321 wild type (Figure 5). We found that the RCK\_C-domain protein CpeA senses c-di-AMP signals  
322 by direct binding of the ligand (Figure 6C). CpeA interacts with CpeB (Figure 6), a structural  
323 homolog of the Na<sup>+</sup>/H<sup>+</sup> antiporter NapA from *T. thermophilus* and a member of the large  
324 monovalent cation / proton antiporter (CPA) superfamily (34). Sodium / proton antiporters exist  
325 in all living cells, where they regulate intracellular pH, sodium levels, and cell volume (37). In  
326 some bacteria, Na<sup>+</sup>/H<sup>+</sup> antiporters use the proton-motive force to extrude sodium out of the cell  
327 and are activated at alkaline pH (38). However, in *Staphylococcus aureus*, the CPA-family  
328 transporter CpaA has a cytosolic RCK\_C domain that binds c-di-AMP to regulate transport  
329 activity (6, 39). Similarly, the regulatory RCK\_C-domain proteins KtrA and KtrC bind c-di-  
330 AMP to control the activity of the corresponding transport units KtrB and KtrD, respectively  
331 (31). Thus, in agreement with this general concept and our data, we propose that c-di-AMP  
332 binds to the regulatory RCK\_C-domain protein CpeA to activate sodium export via CpeB in  
333 *Streptomyces*. At low c-di-AMP, CpeB is presumably inactive allowing accumulation of toxic  
334 Na<sup>+</sup>-ions in the cell and leading to growth defects of  $\Delta disA$  on NaCl containing medium.  
335 However, on the other hand, likely constant activity of CpeB at high c-di-AMP in  $\Delta ataC$  may  
336 result in continuous proton influx affecting intracellular pH and thus important cellular  
337 functions causing growth and developmental defects.

338 In summary, in this study we identified AtaC as a new component of c-di-AMP  
339 metabolism in bacteria and uncovered CpeA as the link between c-di-AMP and ion balance in  
340 multicellular actinomycetes.

341 **MATERIAL AND METHODS**

342 For a full explanation of the experimental protocols, see Extended Experimental Procedures in  
343 Supplemental Information.

344 **Bacterial strains and plasmids**

345 All strains, plasmids and oligonucleotides used in this study are listed in Table S1. Plasmids  
346 and strains were constructed as described in Extended Experimental Procedures.

347 **Protein overexpression and purification**

348 *E. coli* BL21 (DE3) pLysS and Rosetta (DE3), respectively, were used for protein  
349 overexpression. Cultures were grown in presence of required antibiotics at 37°C and induced  
350 with IPTG in the logarithmic phase and transferred for growth at 16°C overnight. Strains  
351 overexpressing 6xHis-AtaC, 6xHis-AtaCD<sub>269N</sub>, 6xHis-Vnz\_31010, and 6xHis-AtaC<sub>S<sub>pn</sub></sub> were  
352 supplemented with MnCl<sub>2</sub> (17). Cultures were harvested and lysed using a FrenchPress and the  
353 proteins were purified via Ni-NTA chromatography. 6xHis-DisA variants and 6xHis-  
354 Vnz\_28055 were dialyzed twice against 2 L of DisA cyclase buffer (40), and tested PDEs were  
355 dialyzed twice against 2 L PDE buffer with 5-10% glycerol (17) at 4°C. Dialyzed proteins were  
356 stored at -20 °C. For characterization of biophysical properties of 6xHis-AtaC and 6xHis-  
357 AtaCD<sub>269N</sub>, the protein elution was concentrated prior to size exclusion chromatography, flash  
358 frozen in liquid nitrogen and stored at -80°C.

359 **Biochemical characterization of DisA and AtaC variants**

360 Biochemical assays using radioactive-labeled substrates were conducted as described in (32).  
361 For diadenylate cyclase (DAC) assays, 5 μM 6xHis-tagged DisA<sub>S<sub>ven</sub></sub>, DisA<sub>D86A</sub> or DisA<sub>B<sub>Su</sub></sub> were  
362 incubated with 83 nM [<sup>32</sup>P]-ATP (Hartmann Analytic) in DisA cyclase buffer. For  
363 phosphodiesterase (PDE) assays, 100 nM 6xHis-AtaC or 8 μM 6xHis-Vnz\_31010 were mixed  
364 with 2 nM [<sup>32</sup>P]-c-di-AMP (Hartmann Analytic, synthesized using purified 6xHis-DisA<sub>B<sub>Su</sub></sub>) in  
365 PDE buffer. For competition, 100 μM unlabeled c-di-AMP, c-di-GMP or cAMP were added  
366 on ice prior to starting the PDE reactions with [<sup>32</sup>P]-c-di-AMP.

367 Alternatively, enzymatic activity of 6xHis-AtaC and 6xHis-AtaCD<sub>269N</sub> was detected by  
368 separation of non-labeled reaction products by anion exchange chromatography as described in  
369 (29). Reaction solutions contained 50 mM Tris (pH = 7.5), 20 mM NaCl, 100 μM MnCl<sub>2</sub>, 62.5  
370 – 2000 μM ligand (c-di-NMP, 5'-pNpN; N = A or G), 100 nM - 10 μM of 6xHis-AtaC and were

371 incubated at 37°C for 1 h. The reaction was stopped by separating the reaction products from  
372 the protein by ultrafiltration (Centricon, 30 kDA cutoff). The filtrate was diluted to 500 µl with  
373 running buffer A (50 mM Tris, pH 9) and loaded on a 1 ml Resource™ Q anion exchange  
374 column (GE Healthcare Life Sciences). A linear gradient to 40% running buffer B (50 mM Tris,  
375 1 M NaCl, pH 9) over 20 column volumes (CV) was used to separate the nucleotides. The  
376 product peaks were identified by comparison to nucleotide standards, c-di-NMP, pNpN, N = A  
377 or G obtained from BioLog.

#### 378 **Differential radial capillary action of ligand assay**

379 DRaCALAs were performed using 2 µg of purified 6xHis-CpeA (Vnz\_28055) as described in  
380 Roelofs et al 2011 (33) with minor modifications. Purified HD domain of PgpH from *L.*  
381 *monocytogenes* (17) fused to an N-terminal GST tag was used as a positive control. For  
382 competition, reactions were supplemented 100 µM of non-labeled c-di-AMP or c-di-GMP prior  
383 to addition of [<sup>32</sup>P]-c-di-AMP.

#### 384 **Western blotting**

385 For detection of 3xFLAG-tagged DisA, Western blot analysis was performed as described in  
386 (32) using 5 µg total protein of *S. venezuelae*  $\Delta$ *disA* expressing the FLAG-tagged *disA* allele  
387 from the  $\Phi$ *BT1* integration site under the control of the native promoter. Anti-FLAG primary  
388 antibody (Sigma) and the anti-mouse IgG-HRP (Thermo Fisher Scientific) were used for  
389 detection. AtaC was detected in the wild type strain (10 µg total protein) using polyclonal rabbit  
390 anti-AtaC antiserum as primary antibody (generated by Pineda GmbH using purified 6xHis-  
391 AtaC) and donkey anti-rabbit-HRP secondary antibody (GE Healthcare). ECL  
392 chemiluminescent detection reagent (Perkin Elmer) was used for visualization.

#### 393 **c-di-AMP extraction and quantification**

394 The nucleotide extraction protocol from (2) was adapted to *Streptomyces*. Wild type,  $\Delta$ *disA* and  
395  $\Delta$ *ataC* strains were grown in MYM. Samples for c-di-AMP extraction and for determination of  
396 the protein concentration were taken every 2 h after initial growth for 10 h. c-di-AMP was  
397 extracted using acetonitrile/methanol from cells disrupted using the BeadBlaster (Biozym).  
398 Samples were analyzed using LC-MS/MS as described in (2).

#### 399 **Bacterial Adenylate Cyclase Two-Hybrid (BACTH) assays**

400 BACTH system was used to assay protein-protein interaction of CpeA and CpeB *in vivo* (35).  
401 Plasmids expressing C-terminal fusions of CpeA and CpeB to T18 and T25 fragments of *cyxA*  
402 from *Bordetella pertussis*, respectively, were transformed into *E. coli* W3110 lacking *cya* (41).  
403 Co-transformants were spotted on MacConkey agar supplemented with maltose (1%),  
404 ampicillin (100 µg/ml), and kanamycin (50 µg/ml). Red colonies indicate cAMP-dependent  
405 fermentation of maltose which occurs upon direct interactions of the proteins fused to the  
406 otherwise separate adenylate cyclase domains.

#### 407 **Small-angle X-ray scattering**

408 Size-exclusion chromatography coupled small-angle X-ray scattering data (42, 43) for AtaC  
409 were collected at the EMBL Hamburg P12 beamline at PETRA3 (DESY, Hamburg).  
410 CHROMIXS of the ATSAS Suite (44) was used for analysis and processing of the  
411 chromatogram results. In brief, after choosing an appropriate buffer region and averaging of the  
412 respective frames, the protein scattering frames from the elution peak were buffer subtracted  
413 and averaged. The final protein scattering data were then analyzed using the ATSAS suite. The  
414 theoretical scattering curve of the AtaC model derived from HHpred/MODELLER was  
415 obtained using CRY SOL (45). Ab initio models were calculated using DAMMIF and averaged  
416 using DAMAVER as described earlier (29).

#### 417 **Nano differential scanning fluorimetry**

418 Thermal unfolding experiments of AtaC were performed with a Tycho NT.6 instrument  
419 (NanoTemper Technologies). The samples were heated in a glass capillary at a rate of 30 K/min  
420 and the internal fluorescence at 330 nm and 350 nm was recorded. Data analysis, data  
421 smoothing and calculation of derivatives was done using the internal evaluation features of the  
422 Tycho instrument.

#### 423 **Bioinformatic characterization of AtaC and its abundance in prokaryotes**

424 AtaC was identified as a member of the phosphodiesterase family of proteins by annotation of  
425 the *S. venezuelae* genome with interproscan (version 5.27-66.0;  
426 <http://dx.doi.org/10.7717/peerj.167>) and searching for proteins harboring type I  
427 phosphodiesterase / nucleotide pyrophosphatase domain (Pfam: PF01663).

#### 428 **Scanning electron microscopy (SEM)**

429 SEM was performed as previously described (46).

430 **ACKNOWLEDGEMENTS**

431 We are grateful to Mark J. Buttner and Fabian M. Commichau for helpful discussion and critical  
432 reading of the manuscript and thank Matt Bush for technical support with scanning electron  
433 micrographs. We thank the staff of the EMBL-Hamburg beamline P12 at PETRA3  
434 (EMBL/DESY, Hamburg, Germany) for outstanding scientific support. We also acknowledge  
435 Anna-Lena Hagemann and Annette Garbe for technical support with LC-MS/MS funded by the  
436 DFG Priority Program SPP 1879 (KA 730/9-1). Research in Gregor Witte's lab is funded by  
437 DFG GRK1721 and the DFG Priority Program SPP 1879 (WI 3717/3-1). Research in Natalia  
438 Tschowri's lab is funded by the DFG Emmy Noether-Program (TS 325/1-1) and the DFG  
439 Priority Program SPP 1879 (TS 325/2-1).

440 **AUTHOR CONTRIBUTIONS**

441 N.T. designed the study. All authors designed and interpreted experiments, which were  
442 performed by A.L., D.J.D., M.M.A-B, G.W., V.K. and K.C.F. The figures were made by A.L.,  
443 D.J.D., M.M.A-B, G.W. and N.T. The paper was written by A.L., D.J.D., G.W. and N.T. with  
444 input from the other authors.

445 **REFERENCES**

- 446 1. R. Hengge *et al.*, Recent Advances and Current Trends in Nucleotide Second Messenger  
447 Signaling in Bacteria. *Journal of molecular biology* **431**, 908-927 (2019).
- 448 2. J. Gundlach *et al.*, An essential poison: Synthesis and degradation of cyclic di-AMP in  
449 *Bacillus subtilis*. *Journal of bacteriology* 10.1128/JB.00564-15 (2015).
- 450 3. F. M. Commichau, J. Gibhardt, S. Halbedel, J. Gundlach, J. Stulke, A Delicate  
451 Connection: c-di-AMP Affects Cell Integrity by Controlling Osmolyte Transport.  
452 *Trends in microbiology* **26**, 175-185 (2018).
- 453 4. J. Gundlach *et al.*, Control of potassium homeostasis is an essential function of the  
454 second messenger cyclic di-AMP in *Bacillus subtilis*. *Sci Signal* **10** (2017).
- 455 5. E. Bremer, R. Kramer, Responses of Microorganisms to Osmotic Stress. *Annu Rev*  
456 *Microbiol* 10.1146/annurev-micro-020518-115504 (2019).
- 457 6. R. M. Corrigan *et al.*, Systematic identification of conserved bacterial c-di-AMP  
458 receptor proteins. *Proceedings of the National Academy of Sciences of the United States*  
459 *of America* **110**, 9084-9089 (2013).
- 460 7. C. F. Schuster *et al.*, The second messenger c-di-AMP inhibits the osmolyte uptake  
461 system OpuC in *Staphylococcus aureus*. *Sci Signal* **9**, ra81 (2016).
- 462 8. J. Gundlach *et al.*, Sustained sensing in potassium homeostasis: Cyclic di-AMP controls  
463 potassium uptake by KimA at the levels of expression and activity. *The Journal of*  
464 *biological chemistry* **294**, 9605-9614 (2019).



- 465 9. I. M. Quintana *et al.*, The KupA and KupB proteins of *Lactococcus lactis* IL1403 are  
466 novel c-di-AMP receptor proteins responsible for potassium uptake. *Journal of*  
467 *bacteriology* 10.1128/JB.00028-19 (2019).
- 468 10. H. T. Pham *et al.*, Enhanced uptake of potassium or glycine betaine or export of cyclic-  
469 di-AMP restores osmoresistance in a high cyclic-di-AMP *Lactococcus lactis* mutant.  
470 *PLoS genetics* **14**, e1007574 (2018).
- 471 11. L. Devaux, P. A. Kaminski, P. Trieu-Cuot, A. Firon, Cyclic di-AMP in host-pathogen  
472 interactions. *Current opinion in microbiology* **41**, 21-28 (2018).
- 473 12. J. J. Woodward, A. T. Iavarone, D. A. Portnoy, c-di-AMP secreted by intracellular  
474 *Listeria monocytogenes* activates a host type I interferon response. *Science* **328**, 1703-  
475 1705 (2010).
- 476 13. A. P. McFarland *et al.*, RECON-Dependent Inflammation in Hepatocytes Enhances  
477 *Listeria monocytogenes* Cell-to-Cell Spread. *mBio* **9** (2018).
- 478 14. K. Parvatiyar *et al.*, The helicase DDX41 recognizes the bacterial secondary messengers  
479 cyclic di-GMP and cyclic di-AMP to activate a type I interferon immune response. *Nat*  
480 *Immunol* **13**, 1155-1161 (2012).
- 481 15. J. R. Barker *et al.*, STING-dependent recognition of cyclic di-AMP mediates type I  
482 interferon responses during *Chlamydia trachomatis* infection. *mBio* **4**, e00018-00013  
483 (2013).
- 484 16. T. Fahmi, S. Faozia, G. C. Port, K. H. Cho, The Second Messenger c-di-AMP Regulates  
485 Diverse Cellular Pathways Involved in Stress Response, Biofilm Formation, Cell Wall  
486 Homeostasis, SpeB Expression, and Virulence in *Streptococcus pyogenes*. *Infect Immun*  
487 **87** (2019).
- 488 17. T. N. Huynh *et al.*, An HD-domain phosphodiesterase mediates cooperative hydrolysis  
489 of c-di-AMP to affect bacterial growth and virulence. *Proceedings of the National*  
490 *Academy of Sciences of the United States of America* **112**, E747-756 (2015).
- 491 18. Y. Bai *et al.*, Two DHH subfamily 1 proteins in *Streptococcus pneumoniae* possess  
492 cyclic di-AMP phosphodiesterase activity and affect bacterial growth and virulence.  
493 *Journal of bacteriology* **195**, 5123-5132 (2013).
- 494 19. R. J. Dey *et al.*, Inhibition of innate immune cytosolic surveillance by an *M. tuberculosis*  
495 phosphodiesterase. *Nature chemical biology* **13**, 210-217 (2017).
- 496 20. G. Witte, S. Hartung, K. Buttner, K. P. Hopfner, Structural biochemistry of a bacterial  
497 checkpoint protein reveals diadenylate cyclase activity regulated by DNA  
498 recombination intermediates. *Mol Cell* **30**, 167-178 (2008).
- 499 21. R. M. Corrigan, A. Grundling, Cyclic di-AMP: another second messenger enters the  
500 fray. *Nature reviews. Microbiology* **11**, 513-524 (2013).
- 501 22. F. Rao *et al.*, YybT is a signaling protein that contains a cyclic dinucleotide  
502 phosphodiesterase domain and a GGDEF domain with ATPase activity. *The Journal of*  
503 *biological chemistry* **285**, 473-482 (2010).
- 504 23. K. F. Chater, Recent advances in understanding *Streptomyces*. *F1000Res* **5**, 2795  
505 (2016).
- 506 24. M. J. Bush, N. Tschowri, S. Schlimpert, K. Flardh, M. J. Buttner, c-di-GMP signalling  
507 and the regulation of developmental transitions in streptomycetes. *Nature reviews.*  
508 *Microbiology* **13**, 749-760 (2015).

- 509 25. N. Tschowri, Cyclic Dinucleotide-Controlled Regulatory Pathways in *Streptomyces*  
510 Species. *Journal of bacteriology* **198**, 47-54 (2016).
- 511 26. R. J. St-Onge *et al.*, Nucleotide second messenger-mediated regulation of a muralytic  
512 enzyme in *streptomyces*. *Molecular microbiology* **96**, 779-795 (2015).
- 513 27. A. Hildebrand, M. Remmert, A. Biegert, J. Soding, Fast and accurate automatic  
514 structure prediction with HHpred. *Proteins* **77 Suppl 9**, 128-132 (2009).
- 515 28. V. Agarwal, S. A. Borisova, W. W. Metcalf, W. A. van der Donk, S. K. Nair, Structural  
516 and mechanistic insights into C-P bond hydrolysis by phosphonoacetate hydrolase.  
517 *Chem Biol* **18**, 1230-1240 (2011).
- 518 29. D. J. Drexler, M. Muller, C. A. Rojas-Cordova, A. M. Bandera, G. Witte, Structural and  
519 Biophysical Analysis of the Soluble DHH/DHHA1-Type Phosphodiesterase TM1595  
520 from *Thermotoga maritima*. *Structure* **25**, 1887-1897 e1884 (2017).
- 521 30. S. Schlimpert *et al.*, Two dynamin-like proteins stabilize FtsZ rings during *Streptomyces*  
522 sporulation. *Proceedings of the National Academy of Sciences of the United States of*  
523 *America* **114**, E6176-E6183 (2017).
- 524 31. M. Schrecker, D. Wunnicke, I. Hanelt, How RCK domains regulate gating of K<sup>+</sup>  
525 channels. *Biological chemistry* **400**, 1303-1322 (2019).
- 526 32. M. M. Al-Bassam, J. Haist, S. A. Neumann, S. Lindenberg, N. Tschowri, Expression  
527 Patterns, Genomic Conservation and Input Into Developmental Regulation of the  
528 GGDEF/EAL/HD-GYP Domain Proteins in *Streptomyces*. *Front Microbiol* **9**, 2524  
529 (2018).
- 530 33. K. G. Roelofs, J. Wang, H. O. Sintim, V. T. Lee, Differential radial capillary action of  
531 ligand assay for high-throughput detection of protein-metabolite interactions.  
532 *Proceedings of the National Academy of Sciences of the United States of America* **108**,  
533 15528-15533 (2011).
- 534 34. C. Lee *et al.*, A two-domain elevator mechanism for sodium/proton antiport. *Nature*  
535 **501**, 573-577 (2013).
- 536 35. G. Karimova, J. Pidoux, A. Ullmann, D. Ladant, A bacterial two-hybrid system based  
537 on a reconstituted signal transduction pathway. *Proceedings of the National Academy*  
538 *of Sciences of the United States of America* **95**, 5752-5756 (1998).
- 539 36. M. Ye *et al.*, DhhP, a cyclic di-AMP phosphodiesterase of *Borrelia burgdorferi*, is  
540 essential for cell growth and virulence. *Infect Immun* **82**, 1840-1849 (2014).
- 541 37. E. Padan, M. Venturi, Y. Gerchman, N. Dover, Na<sup>(+)</sup>/H<sup>(+)</sup> antiporters. *Biochim*  
542 *Biophys Acta* **1505**, 144-157 (2001).
- 543 38. T. A. Krulwich, G. Sachs, E. Padan, Molecular aspects of bacterial pH sensing and  
544 homeostasis. *Nature reviews. Microbiology* **9**, 330-343 (2011).
- 545 39. K. H. Chin *et al.*, Structural Insights into the Distinct Binding Mode of Cyclic Di-AMP  
546 with SaCpaA\_RCK. *Biochemistry* **54**, 4936-4951 (2015).
- 547 40. M. Christen, B. Christen, M. Folcher, A. Schauerte, U. Jenal, Identification and  
548 characterization of a cyclic di-GMP-specific phosphodiesterase and its allosteric control  
549 by GTP. *The Journal of biological chemistry* **280**, 30829-30837 (2005).
- 550 41. S. Herbst *et al.*, Transmembrane redox control and proteolysis of PdeC, a novel type of  
551 c-di-GMP phosphodiesterase. *The EMBO journal* **37** (2018).

- 552 42. C. M. Jeffries *et al.*, Preparing monodisperse macromolecular samples for successful  
553 biological small-angle X-ray and neutron-scattering experiments. *Nat Protoc* **11**, 2122-  
554 2153 (2016).
- 555 43. C. E. Blanchet *et al.*, Versatile sample environments and automation for biological  
556 solution X-ray scattering experiments at the P12 beamline (PETRA III, DESY). *J Appl*  
557 *Crystallogr* **48**, 431-443 (2015).
- 558 44. D. Franke *et al.*, ATSAS 2.8: a comprehensive data analysis suite for small-angle  
559 scattering from macromolecular solutions. *J Appl Crystallogr* **50**, 1212-1225 (2017).
- 560 45. D. I. Svergun, C. Barberato, M. H. J. Koch, CRY SOL - a Program to Evaluate X-ray  
561 Solution Scattering of Biological Macromolecules from Atomic Coordinates *J. Appl.*  
562 *Cryst.* **28**, 768-773 (1995).
- 563 46. N. Tschowri *et al.*, Tetrameric c-di-GMP mediates effective transcription factor  
564 dimerization to control *Streptomyces* development. *Cell* **158**, 1136-1147 (2014).
- 565 47. H. Kim *et al.*, Structural Studies of Potassium Transport Protein KtrA Regulator of  
566 Conductance of K<sup>+</sup> (RCK) C Domain in Complex with Cyclic Diadenosine  
567 Monophosphate (c-di-AMP). *The Journal of biological chemistry* **290**, 16393-16402  
568 (2015).
- 569 48. R. Rocha, C. M. Teixeira-Duarte, J. M. P. Jorge, J. H. Morais-Cabral, Characterization  
570 of the molecular properties of KtrC, a second RCK domain that regulates a Ktr channel  
571 in *Bacillus subtilis*. *J Struct Biol* **205**, 34-43 (2019).  
572  
573

574 FIGURES WITH LEGENDS

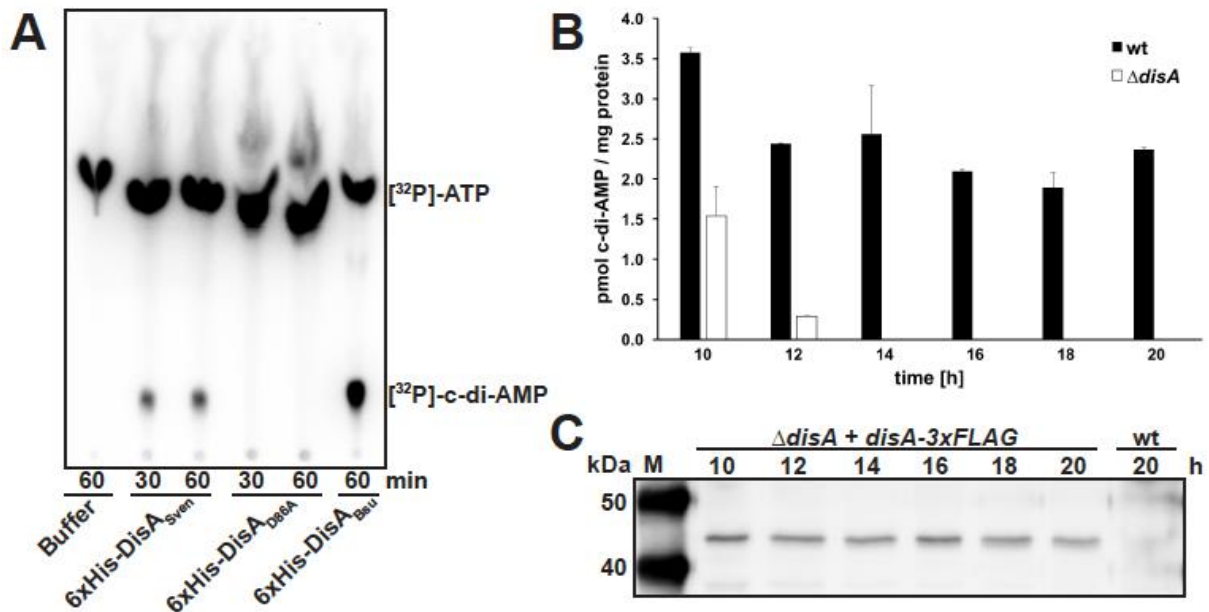

575

576

577 **Figure 1. DisA is an active diadenylate cyclase *in vitro* and *in vivo*.**

578 (A) Thin layer chromatography of diadenylate cyclase (DAC) assay with purified 6xHis-  
579 DisAS<sub>ven</sub> and 6xHis-DisA<sub>D86A</sub>, and [<sup>32</sup>P]-ATP as substrate. Migration of [<sup>32</sup>P]-ATP in buffer is  
580 shown in lane 1. 6xHis-DisA<sub>Bsu</sub> served as positive control for DAC activity.

581 (B) Intracellular c-di-AMP levels in *S. venezuelae* wild type and  $\Delta disA$  during late vegetative  
582 growth (10 to 12 h), early sporulation (14 to 16 h) and sporulation (from 18 h). Data are  
583 presented as mean of biological replicates  $\pm$  standard deviation (n=3).

584 (C) Expression profile of DisA-3xFLAG in a *disA* mutant complemented with *disA-3xFLAG*  
585 under control of *disA* promoter grown in liquid sporulation medium (MYM). DisA-3xFLAG  
586 was detected using a monoclonal anti-FLAG antibody. Wild type served as negative control.

587

588

589

590

591



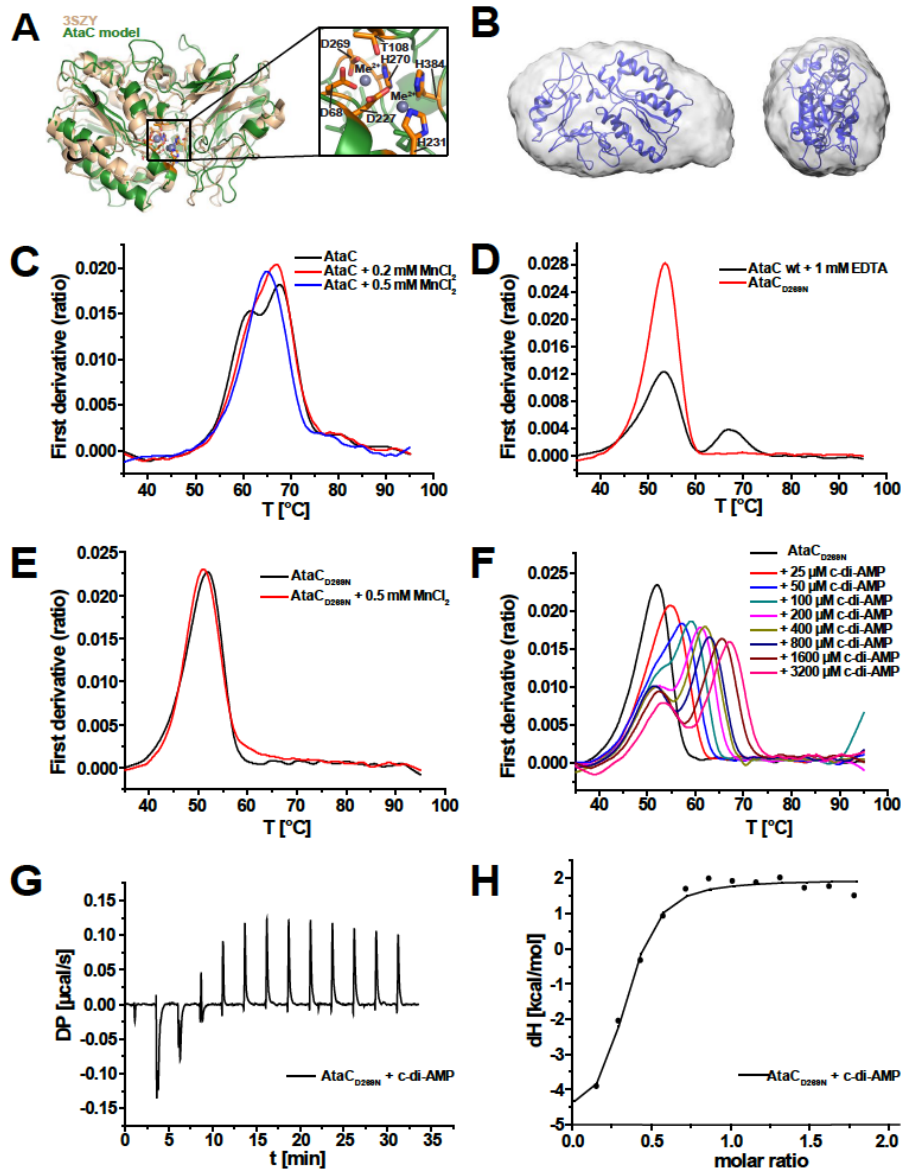

604

605

606 **Figure 3. AtaC is a monomeric  $Mn^{2+}$ -dependent phosphodiesterase.**

607 (A) Model of AtaC obtained from HHpred/MODELLER (green) superimposed with best match  
 608 3SZY (beige), Zoom-In shows the predicted active site, annotated with all most conserved  
 609 residues.

610 (B) Modelled structure from (A) superimposed with the final averaged and filtered *ab initio*  
 611 shape (16 *ab initio* models averaged) from SEC-SAXS with front view (left) and side view  
 612 (right).

613 (C) nanoDSF thermal shift first derivative curves of 10 $\mu$ M apo AtaC (black), 10 $\mu$ M AtaC + 0.2  
614 mM MnCl<sub>2</sub> (red) and 10 $\mu$ M AtaC + 0.5 mM MnCl<sub>2</sub> (blue).

615 (D) nanoDSF thermal shift first derivative curves of 10  $\mu$ M AtaC + 1 mM EDTA (black) and  
616 10 $\mu$ M AtaC<sub>D269N</sub> (red).

617 (E) nanoDSF thermal shift first derivative curves of 10  $\mu$ M AtaC<sub>D269N</sub> (black) and AtaC<sub>D269N</sub> +  
618 0.5 mM MnCl<sub>2</sub> (red).

619 (F) nanoDSF thermal shift first derivative curves of 10  $\mu$ M AtaC<sub>D269N</sub> + c-di-AMP (25  $\mu$ M -  
620 3200  $\mu$ M).

621 (G) ITC measurement raw data of 23  $\mu$ M AtaC<sub>D269N</sub> mutant titrated with 231  $\mu$ M c-di-AMP.

622 (H) Binding curve and fit of ITC titration of the AtaC<sub>D269N</sub> mutant with c-di-AMP ( $K_D = 731 \pm$   
623 266 nM) (n=3).

624

625

626

627

628

629

630

631

632

633

634

635

636

637

638

639

640

641

642

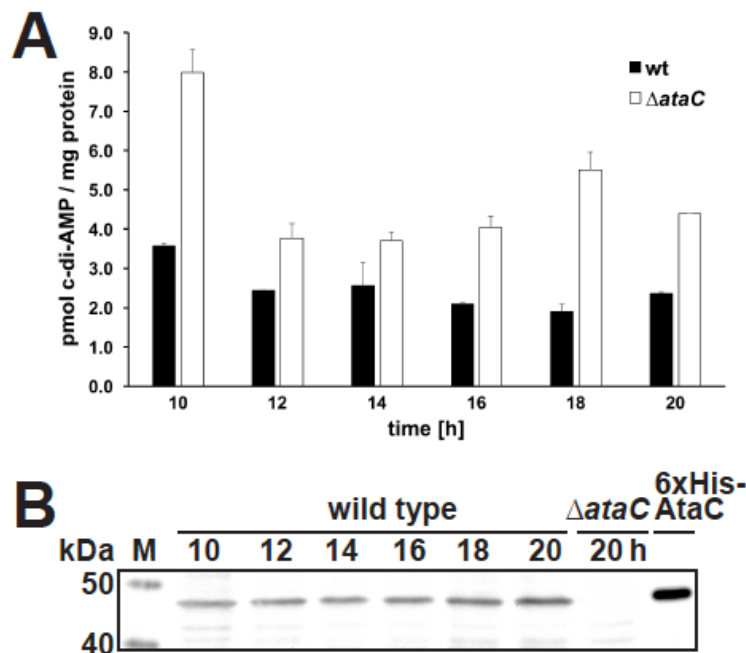

643

644

645 **Figure 4. AtaC hydrolyzes c-di-AMP *in vivo* and is constitutively expressed during the life**  
646 **cycle of *S. venezuelae*.**

647 (A) Intracellular c-di-AMP levels in *S. venezuelae* wild type and  $\Delta$ ataC during late vegetative  
648 growth (10 to 12 h), early sporulation (14 to 16 h) and sporulation (from 18 h). Data are  
649 presented as mean of biological replicates  $\pm$  standard deviation (n=3).

650 (B) Expression profile of AtaC in *S. venezuelae* wild type grown in liquid sporulation medium  
651 (MYM). AtaC was detected using a polyclonal anti-AtaC antiserum. Protein samples harvested  
652 from  $\Delta$ ataC served as negative control and purified 6xHis-AtaC as positive control,  
653 respectively.

654

655

656

657

658



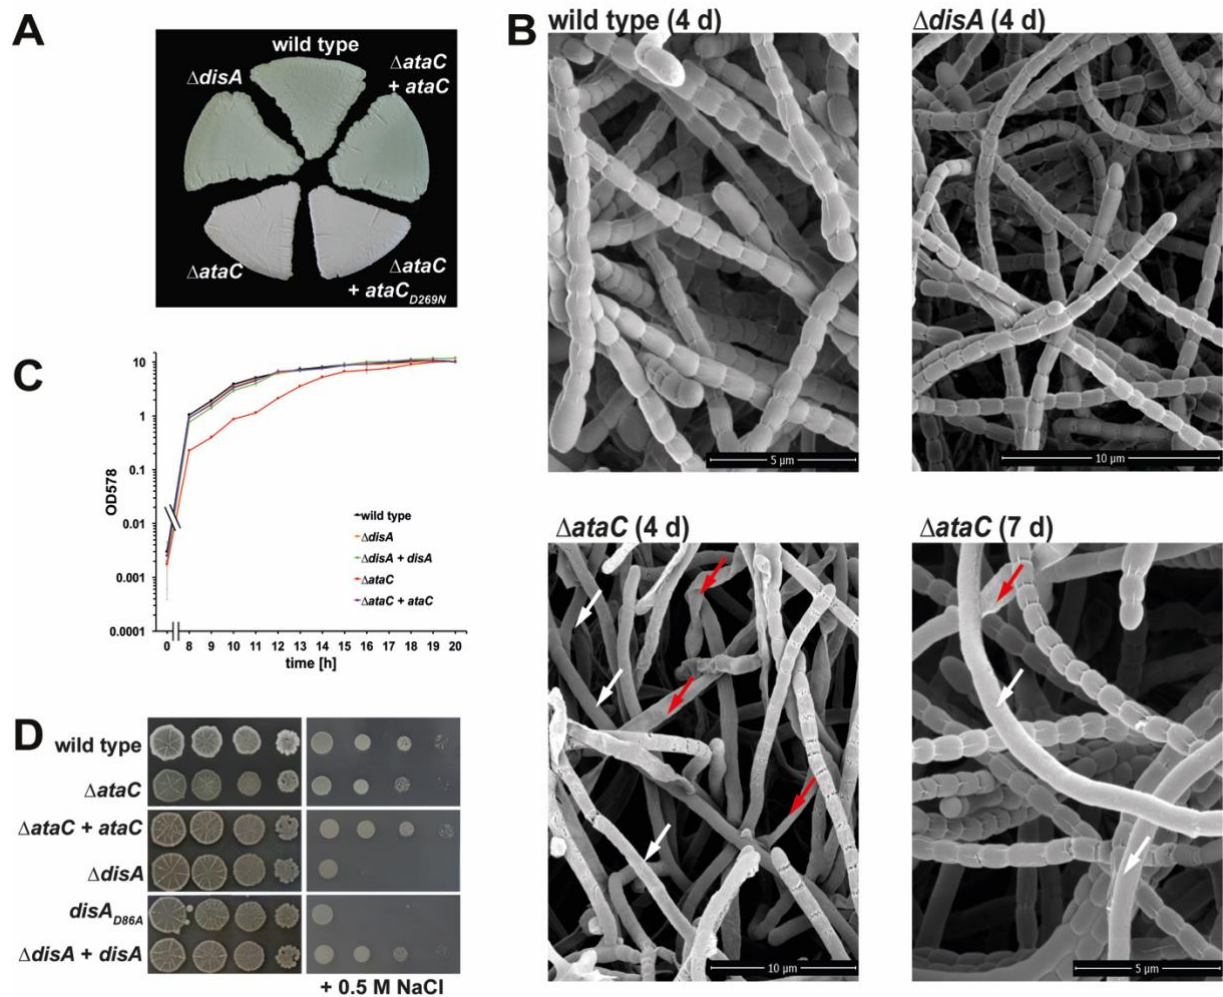

659

660

661 **Figure 5. Mutagenesis of c-di-AMP metabolizing enzymes impacts development and ionic**  
 662 **stress resistance in *S. venezuelae*.**

663 (A) Green morphologies of *S. venezuelae* wild type and  $\Delta disA$  indicate formation of mature  
 664 spores after 4 days of growth at 30°C on solid sporulation medium (MYM agar). *S. venezuelae*  
 665  $\Delta ataC$  fails to accumulate the spore pigment and remains white after the same incubation time.  
 666 Wild type *ataC* allele complements the  $\Delta ataC$  phenotype but not the enzymatically inactive  
 667 variant *ataC*<sub>D269N</sub>, when expressed *in trans* under control of the native promoter.

668 (B) Scanning electron micrographs showing that after 4 days of incubation on MYM, *S.*  
 669 *venezuelae* wild type and  $\Delta disA$  form spores but  $\Delta ataC$  consists predominantly of non-  
 670 sporulating aerial hyphae (white arrows) and forms flat, likely lysed hyphae (red arrows). After

671 7 days of growth,  $\Delta$ *ataC* produced wild type-like spore chains but occasional non-differentiated  
672 and lysed hyphae were still detectable.

673 (C) Deletion of *ataC* leads to a growth defect in *S. venezuelae*. c-di-AMP mutants were grown  
674 in liquid sporulation medium (MYM) at 30°C and optical density was measured at 578 nm.  
675  $\Delta$ *ataC* growth is delayed by 3 h and can be restored by expression of the wild type allele under  
676 control of its native promoter from the *attB* <sub>$\Phi$ BT1</sub> site.

677 (D) Osmotic stress resistance of c-di-AMP mutants. Serial dilutions of spores were spotted on  
678 nutrient agar [NA] without additional salt or supplemented with 0.5 M NaCl and grown at 30°C  
679 for ~2 days.  $\Delta$ *disA* and *disA*<sub>D86A</sub> (expressing inactive DisA) are hypersensitive to salt stress.

680

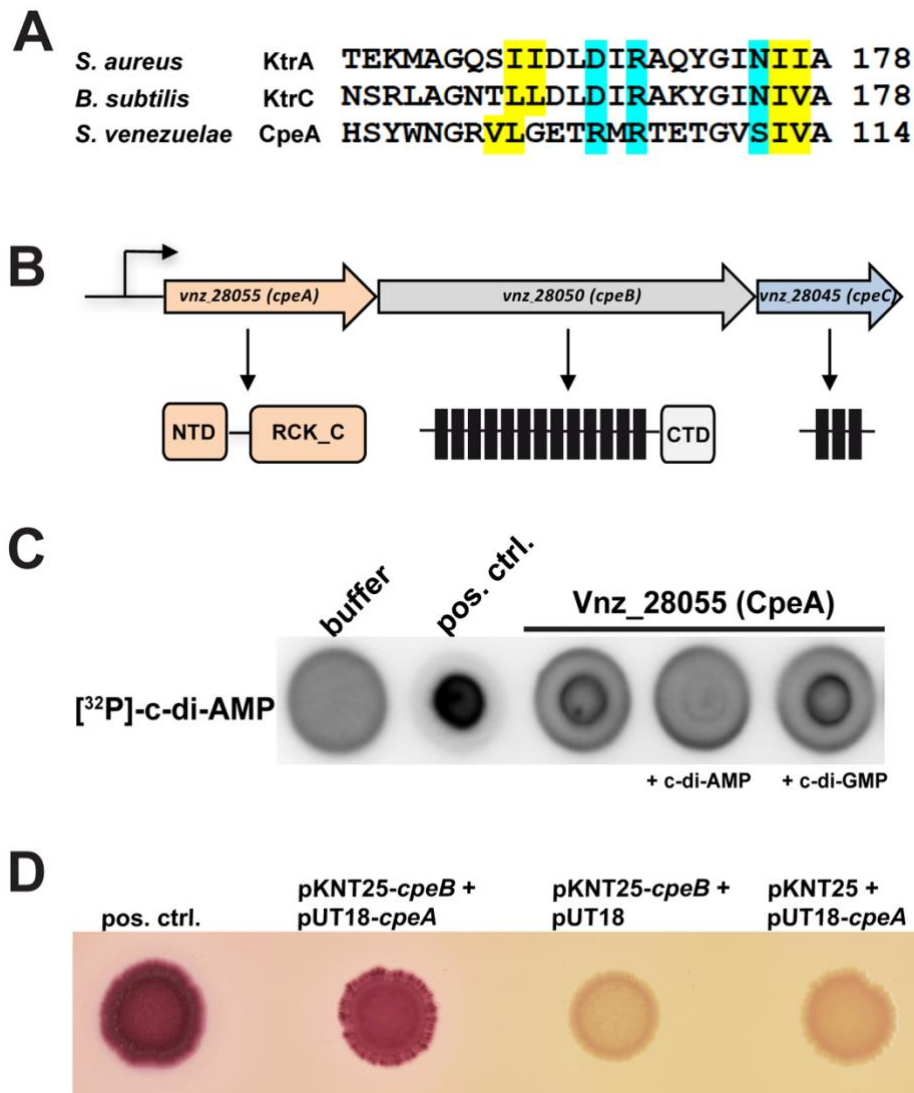

681

682

683 **Figure 6. Vnz\_28055 (CpeA) binds c-di-AMP.**

684 (A) Alignment of the c-di-AMP binding regions in RCK\_C (regulator of conductance of K<sup>+</sup>,  
 685 Carboxy-terminal) domains was generated using Clustal Omega. C-di-AMP binding residues  
 686 in KtrA (*S. aureus*;(47)), KtrC (*B. subtilis*;(48)) and conserved amino acids in CpeA are  
 687 highlighted. Amino acids that form the hydrophobic patch are shown in yellow, residues  
 688 involved in hydrophilic coordination are highlighted in cyan.

689 (B) *CpeA* (*vnz\_28055*), *cpeB* (*vnz\_28050*) and *cpeC* (*vnz\_28045*) form an operon in *S.*  
 690 *venezuelae*. CpeA has an N-terminal domain (NTD) of unknown function and a C-terminal  
 691 RCK\_C domain. NheB is a predicted structural homolog to the Na<sup>+</sup>/H<sup>+</sup> antiporter NapA (34).

692 It consists of 13 transmembrane (TM) domains and a cytosolic fraction at the C-terminus  
693 (CTD). NheC is a predicted membrane protein with 3 TM domains.

694 (C) CpeA binds [<sup>32</sup>P]-c-di-AMP in DRaCALAs. Binding of the radiolabeled ligand is indicated  
695 by dark spots centered on the nitrocellulose. In competition assays, excess (100 μM) cold c-di-  
696 AMP or c-di-GMP, respectively, was added to the binding reaction containing [<sup>32</sup>P]-c-di-AMP  
697 and 6xHis-CpeA.

698 (D) Adenylate cyclase-based two hybrid assays revealing that CpeA and CpeB interact *in vivo*.  
699 Using pKNT25 and pUT18, the T25 and T18 fragments of adenylate cyclase are attached at the  
700 C-termini of CpeB and CpeA, respectively. As a positive control, the leucin zipper part of the  
701 yeast GCN4 protein was used. Spotted co-transformants were grown for 20 h at 30°C with  
702 further incubation at room temperature for ca. 3 days.

703

704

705
